# Supplementary material for: Association of Full Breastfeeding Duration with Postpartum Weight Retention in a Cohort of Predominantly Breastfeeding Women
Source: PubMed Central journal article supplement (PMC6520964; doi:10.3390/nu11040938), 2019-04-25
Supplement: nutrients-11-00938-s001.pdf [file nutrients-11-00938-s001.pdf]

**Table S1.** Differences in barriers to lactation among mothers who fully breastfed to one month only and those who fully breastfed for more than one month ( $n = 338$ ).

| Maternal Breastfeeding Concern           | Full breastfeeding duration |                           | <i>p</i> -Value |
|------------------------------------------|-----------------------------|---------------------------|-----------------|
|                                          | 1 month<br>( $n = 23$ )     | >1 month<br>( $n = 315$ ) |                 |
| <i>N</i> (%)                             |                             |                           |                 |
| <b>Delayed lactogenesis</b>              |                             |                           |                 |
| No                                       | 22 (96)                     | 299 (95)                  | 0.88            |
| Yes                                      | 1 (4)                       | 16 (5)                    |                 |
| <b>Trouble with milk flow</b>            |                             |                           |                 |
| No                                       | 21 (91)                     | 304 (97)                  | 0.21            |
| Yes                                      | 2 (9)                       | 11 (3)                    |                 |
| <b>Insufficient milk supply</b>          |                             |                           |                 |
| No                                       | 21 (91)                     | 301 (96)                  | 0.35            |
| Yes                                      | 2 (9)                       | 14 (4)                    |                 |
| <b>Sore, cracked or bleeding nipples</b> |                             |                           |                 |
| No                                       | 10 (43)                     | 139 (44)                  | 0.95            |
| Yes                                      | 13 (57)                     | 176 (56)                  |                 |
| <b>Engorged breasts</b>                  |                             |                           |                 |
| No                                       | 15 (65)                     | 171 (54)                  | 0.31            |
| Yes                                      | 8 (35)                      | 144 (46)                  |                 |
| <b>Breast yeast infection</b>            |                             |                           |                 |
| No                                       | 23 (100)                    | 312 (99)                  | 0.64            |
| Yes                                      | 0                           | 3 (1)                     |                 |
| <b>Clogged milk ducts</b>                |                             |                           |                 |
| No                                       | 22 (96)                     | 293 (93)                  | 0.63            |
| Yes                                      | 1 (4)                       | 22 (7)                    |                 |
| <b>Infected or abscessed breasts</b>     |                             |                           |                 |
| No                                       | 22 (96)                     | 310 (98)                  | 0.33            |
| Yes                                      | 1 (4)                       | 5 (2)                     |                 |
| <b>Breast milk leakage</b>               |                             |                           |                 |
| No                                       | 21 (91)                     | 288 (91)                  | 0.98            |
| Yes                                      | 2 (9)                       | 27 (9)                    |                 |

**Table S2.** Association of maternal and infant covariates with maternal postpartum weight retention from 1 to 6 months postpartum ( $n = 301$ ).

| <b>Type 3 Tests of Fixed Effects</b>            |                                     |                                       |                |                |
|-------------------------------------------------|-------------------------------------|---------------------------------------|----------------|----------------|
| <b>Variable</b>                                 | <b>Numerator Degrees of Freedom</b> | <b>Denominator Degrees of Freedom</b> | <b>F Value</b> | <b>p-Value</b> |
| <b>FBF duration</b>                             | 2                                   | 285                                   | 0.64           | 0.53           |
| <b>Time</b>                                     | 2                                   | 285                                   | 1.63           | 0.20           |
| <b>FBF duration *Time</b>                       | 4                                   | 285                                   | 2.58           | 0.04 *         |
| <b>GWG</b>                                      | 1                                   | 285                                   | 299.55         | <0.01 *        |
| <b>GWG*Time</b>                                 | 2                                   | 285                                   | 13.72          | <0.01 *        |
| <b>Maternal Education</b>                       | 2                                   | 285                                   | 1.11           | 0.33           |
| <b>Maternal Education*Time</b>                  | 4                                   | 285                                   | 4.55           | <0.01 *        |
| <b>Maternal Race</b>                            | 1                                   | 285                                   | 0.14           | 0.71           |
| <b>Parity</b>                                   | 2                                   | 285                                   | 1.41           | 0.25           |
| <b>Parity*Time</b>                              | 4                                   | 285                                   | 3.18           | 0.01 *         |
| <b>Frequency of Feeds</b>                       | 1                                   | 285                                   | 2.30           | 0.13           |
| <b>Physical Activity at 3 Months Postpartum</b> | 1                                   | 285                                   | 7.16           | 0.01 *         |
| <b>Delivery Mode</b>                            | 1                                   | 285                                   | 0.01           | 0.91           |
| <b>Delivery Mode*Time</b>                       | 2                                   | 285                                   | 3.07           | 0.05 *         |
| <b>Household Income</b>                         | 2                                   | 285                                   | 0.68           | 0.51           |
| <b>Maternal Age</b>                             | 1                                   | 285                                   | 4.15           | 0.04 *         |
| <b>Infant Sex</b>                               | 1                                   | 285                                   | 0.00           | 0.96           |
| <b>Infant Birthweight</b>                       | 1                                   | 285                                   | 3.08           | 0.08           |

Abbreviations: FBF=full breastfeeding; GWG=gestational weight gain. \*  $p < 0.05$ .
